# Supplementary material for: Insights into the Endophytic Bacterial Community Comparison and their Potential Role in the Dimorphic Seeds of Halophyte Suaeda Glauca
Source: Research Square preprint supplement (doi:10.21203/rs.3.rs-153202/v1), 2021-02-02
Supplement: Supplementary file 1 [file 31f7320b553f9b1ca6194869.docx]

**Table S3. The detailed statistical information of the relative abundance of endophytic bacterial community at Phylum level between brown seeds and black seeds.**

| Phylum | Relative abundance (Mean ± Sd) (%) | | P-value |
| --- | --- | --- | --- |
| Br | Bl |
| *Proteobacteria*  *Firmicutes*  *Actinobacteria*  *Bacteroidetes*  *Fusobacteria*  *Armatimonadetes*  *Patescibacteria*  *Dependentiae*  unclassified_k_norank_d_*Bacteria* | 57.48 ± 19.99  27.34 ± 30.9  13.02 ± 13.28  2.12 ± 1.98  0.02 ± 0.03  0.01 ± 0.02  0.01 ± 0.02  0.01 ± 0.02  0 ± 0 | 58.67 ± 22.8  40.89 ± 22.57  0.22 ± 0.15  0.21 ± 0.18  0 ± 0  0 ± 0  0 ± 0  0 ± 0  0.01 ± 0.02 | 0.6687  0.8086  0.04043  0.04043  0.2525  0.2525  0.2525  0.2525  0.9088 |

**Note**: Br: brown seeds; Bl: black seeds.
